# Supplementary material for: Projecting the development of antimicrobial resistance in Neisseria gonorrhoeae from antimicrobial surveillance data: a mathematical modelling study
Source: Springer Nature journal article supplement (doi:10.1186/s12879-023-08200-4), 2023-04-20

## Additional file 5: posterior distributions

### Tables of posterior distributions

We present here the posterior distributions of all parameters, first separately for each combination of model and antibiotic.

#### Ciprofloxacin

##### Single-step model

| Parameter  | Interpretation             | Posterior median (95% credible interval) | Unit        |
|------------|----------------------------|------------------------------------------|-------------|
| beta (HMW) | Transmission rate (HMW)    | 1.65 (0.60-5.10)                         | Per year    |
| beta (MSM) | Transmission rate (MSM)    | 2.32 (1.01-6.34)                         | Per year    |
| tau (HMW)  | Treatment rate (HMW)       | 0.77 (0.37-2.60)                         | Per year    |
| tau (MSM)  | Treatment rate (MSM)       | 1.33 (0.73-4.22)                         | Per year    |
| nu         | Spontaneous recovery rate  | 0.72 (0.03-3.87)                         | Per year    |
| mu         | Mutation rate              | 0.00071 (0.00003-0.00349)                | Probability |
| epsilon    | Reduced treatment efficacy | 0.40 (0.02-0.81)                         | Probability |

##### Multi-step model

Not done because of the lack of detail on MIC after 2009 in the data

#### Cefixime

##### Single-step model

| Parameter  | Interpretation             | Posterior median (95% credible interval) | Unit        |
|------------|----------------------------|------------------------------------------|-------------|
| beta (HMW) | Transmission rate (HMW)    | 1.46 (0.39-4.68)                         | Per year    |
| beta (MSM) | Transmission rate (MSM)    | 1.93 (0.66-5.91)                         | Per year    |
| tau (HMW)  | Treatment rate (HMW)       | 0.61 (0.18-2.02)                         | Per year    |
| tau (MSM)  | Treatment rate (MSM)       | 0.99 (0.35-3.43)                         | Per year    |
| nu         | Spontaneous recovery rate  | 0.72 (0.03-3.72)                         | Per year    |
| mu         | Mutation rate              | 0.00097 (0.00008-0.00370)                | Probability |
| epsilon    | Reduced treatment efficacy | 0.67 (0.08-0.98)                         | Probability |

##### Multi-step model

| Parameter  | Interpretation             | Posterior median (95% credible interval) | Unit        |
|------------|----------------------------|------------------------------------------|-------------|
| beta (HMW) | Transmission rate (HMW)    | 3.97 (1.93-9.02)                         | Per year    |
| beta (MSM) | Transmission rate (MSM)    | 5.09 (2.46-11.53)                        | Per year    |
| tau (HMW)  | Treatment rate (HMW)       | 3.69 (1.72-8.75)                         | Per year    |
| tau (MSM)  | Treatment rate (MSM)       | 4.72 (2.21-11.05)                        | Per year    |
| nu         | Spontaneous recovery rate  | 0.21 (0.03-0.68)                         | Per year    |
| mu         | Mutation rate              | 0.04 (0.02-0.09)                         | Probability |
| epsilon    | Reduced treatment efficacy | 0.89 (0.65-0.98)                         | Probability |

## Azithromycin

### Single-step model

| Parameter  | Interpretation             | Posterior median (95% credible interval) | Unit        |
|------------|----------------------------|------------------------------------------|-------------|
| beta (HMW) | Transmission rate (HMW)    | 1.27 (0.30-4.54)                         | Per year    |
| beta (MSM) | Transmission rate (MSM)    | 1.60 (0.42-5.15)                         | Per year    |
| tau (HMW)  | Treatment rate (HMW)       | 0.44 (0.13-1.61)                         | Per year    |
| tau (MSM)  | Treatment rate (MSM)       | 0.69 (0.20-2.60)                         | Per year    |
| nu         | Spontaneous recovery rate  | 0.65 (0.02-3.92)                         | Per year    |
| mu         | Mutation rate              | 0.00056 (0.00003-0.00255)                | Probability |
| epsilon    | Reduced treatment efficacy | 0.87 (0.30-0.99)                         | Probability |

### Multi-step model

| Parameter  | Interpretation             | Posterior median (95% credible interval) | Unit        |
|------------|----------------------------|------------------------------------------|-------------|
| beta (HMW) | Transmission rate (HMW)    | 1.97 (0.90-4.80)                         | Per year    |
| beta (MSM) | Transmission rate (MSM)    | 2.19 (1.02-5.40)                         | Per year    |
| tau (HMW)  | Treatment rate (HMW)       | 1.70 (0.70-4.48)                         | Per year    |
| tau (MSM)  | Treatment rate (MSM)       | 1.88 (0.83-5.00)                         | Per year    |
| nu         | Spontaneous recovery rate  | 0.22 (0.03-0.71)                         | Per year    |
| mu         | Mutation rate              | 0.03 (0.01-0.06)                         | Probability |
| epsilon    | Reduced treatment efficacy | 0.98 (0.91-1.00)                         | Probability |

## Ceftriaxone

### Single-step model

| Parameter  | Interpretation             | Posterior median (95% credible interval) | Unit        |
|------------|----------------------------|------------------------------------------|-------------|
| beta (HMW) | Transmission rate (HMW)    | 1.08 (0.22-4.12)                         | Per year    |
| beta (MSM) | Transmission rate (MSM)    | 1.64 (0.41-5.29)                         | Per year    |
| tau (HMW)  | Treatment rate (HMW)       | 0.29 (0.07-1.17)                         | Per year    |
| tau (MSM)  | Treatment rate (MSM)       | 0.68 (0.18-2.99)                         | Per year    |
| nu         | Spontaneous recovery rate  | 0.68 (0.03-3.59)                         | Per year    |
| mu         | Mutation rate              | 0.00022 (0.00000-0.00168)                | Probability |
| epsilon    | Reduced treatment efficacy | 0.91 (0.31-1.00)                         | Probability |

### Multi-step model

| Parameter  | Interpretation             | Posterior median (95% credible interval) | Unit        |
|------------|----------------------------|------------------------------------------|-------------|
| beta (HMW) | Transmission rate (HMW)    | 4.21 (1.32-9.67)                         | Per year    |
| beta (MSM) | Transmission rate (MSM)    | 4.55 (1.41-10.42)                        | Per year    |
| tau (HMW)  | Treatment rate (HMW)       | 3.95 (1.08-9.38)                         | Per year    |
| tau (MSM)  | Treatment rate (MSM)       | 4.23 (1.13-9.92)                         | Per year    |
| nu         | Spontaneous recovery rate  | 0.21 (0.03-0.68)                         | Per year    |
| mu         | Mutation rate              | 0.04 (0.01-0.09)                         | Probability |
| epsilon    | Reduced treatment efficacy | 0.99 (0.36-1.00)                         | Probability |

#'

# Plots of posterior distributions

For each combination of model and antibiotic, we show the summary of the posterior distributions (median and 95% credible interval) of all parameters. We also present pairs plots showing the correlation between parameters. The observed relationships between parameters are in line with what is expected given the model structure: high correlation between  $\beta$ ,  $\tau$  and  $\mu$  within a population as it is the combination of these parameters that determines resistance, and high correlation between  $\beta$  across groups because of the constraint that  $\tau$  must be higher for MSM than for HMW.

## Single-step models

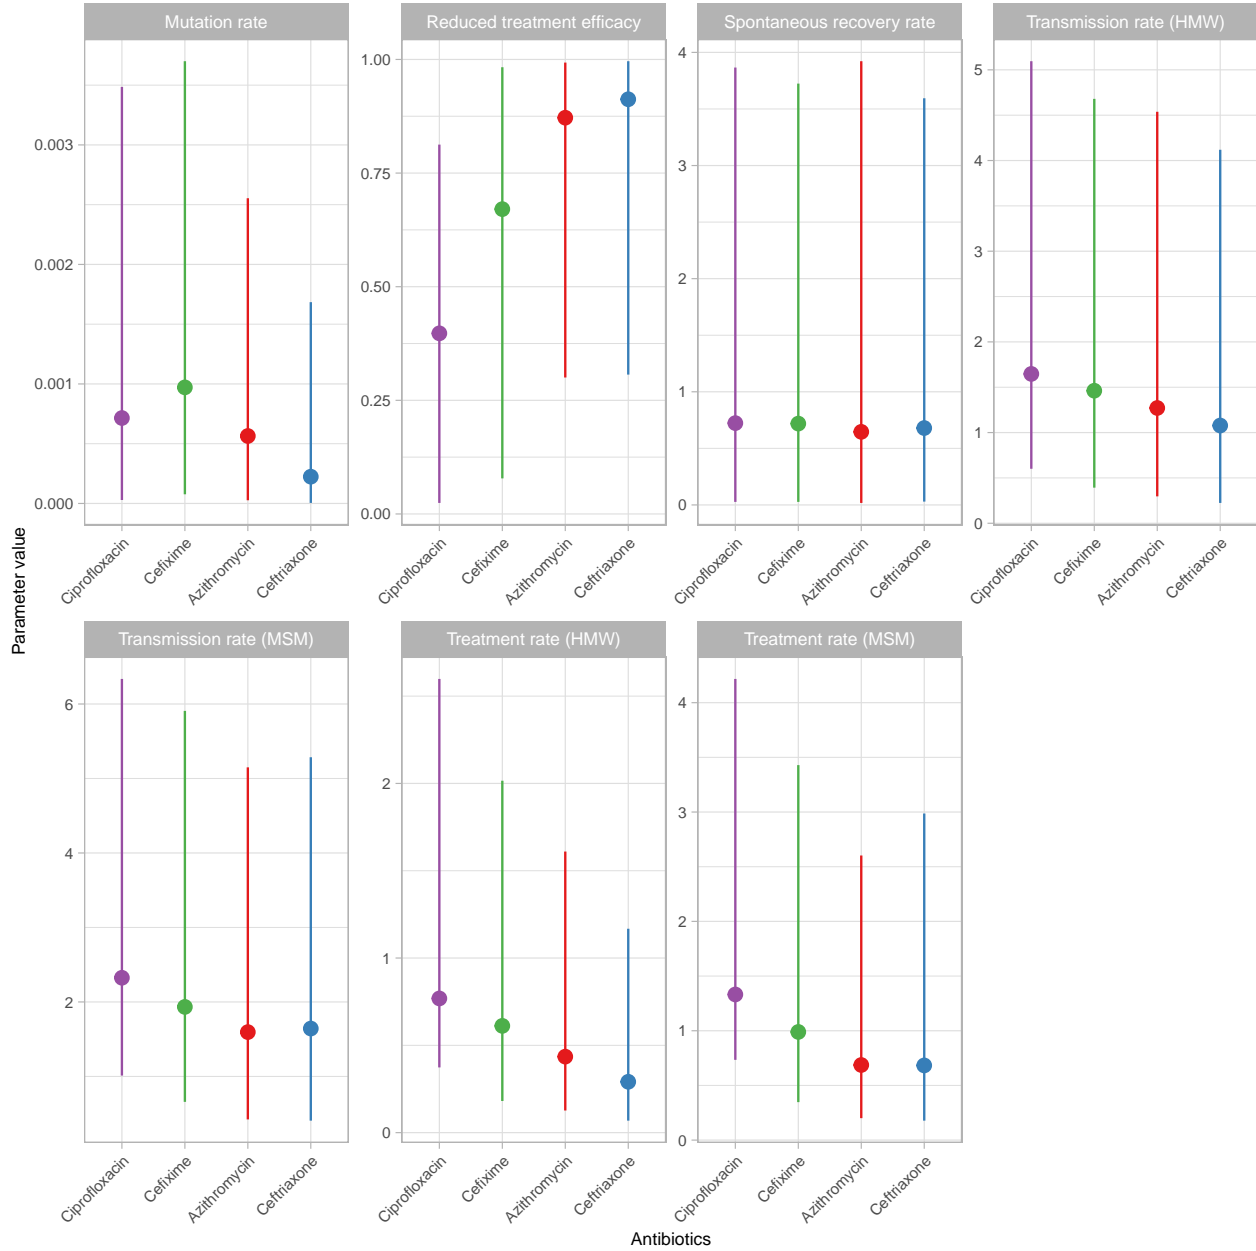

### Azithromycin

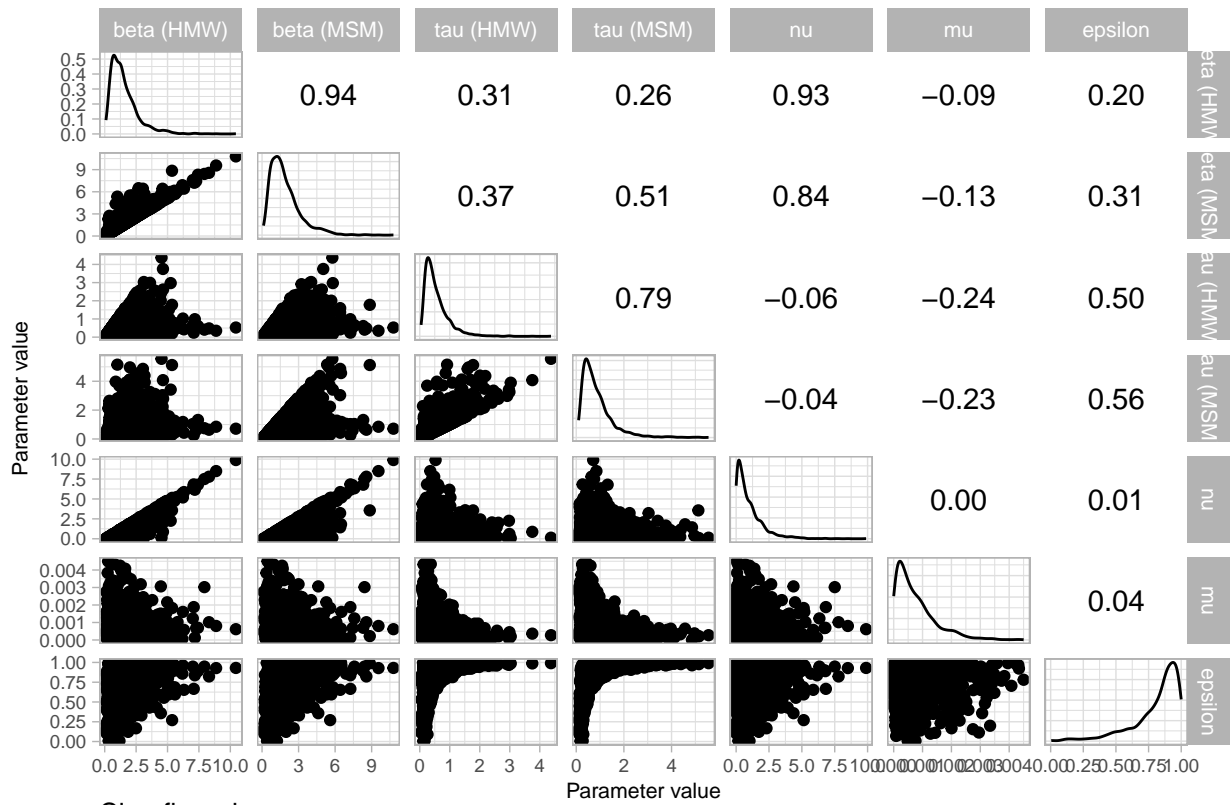

### Ciprofloxacin

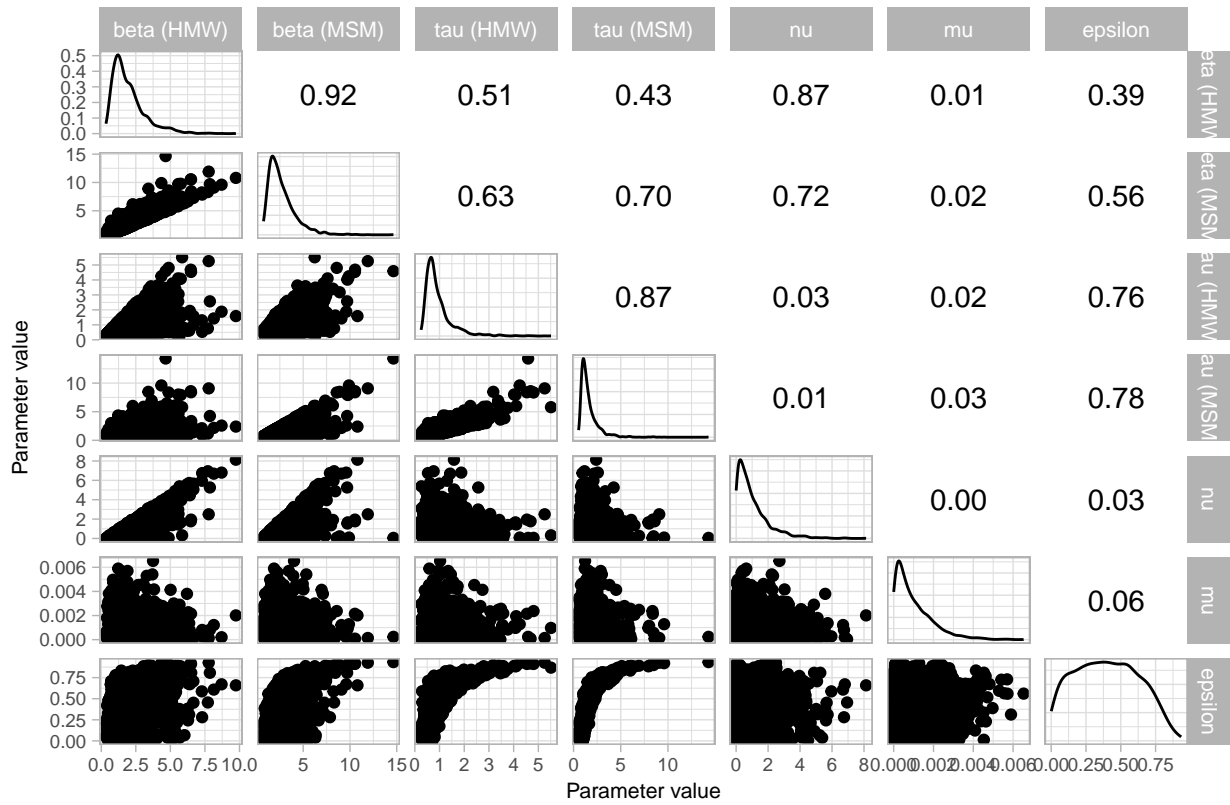

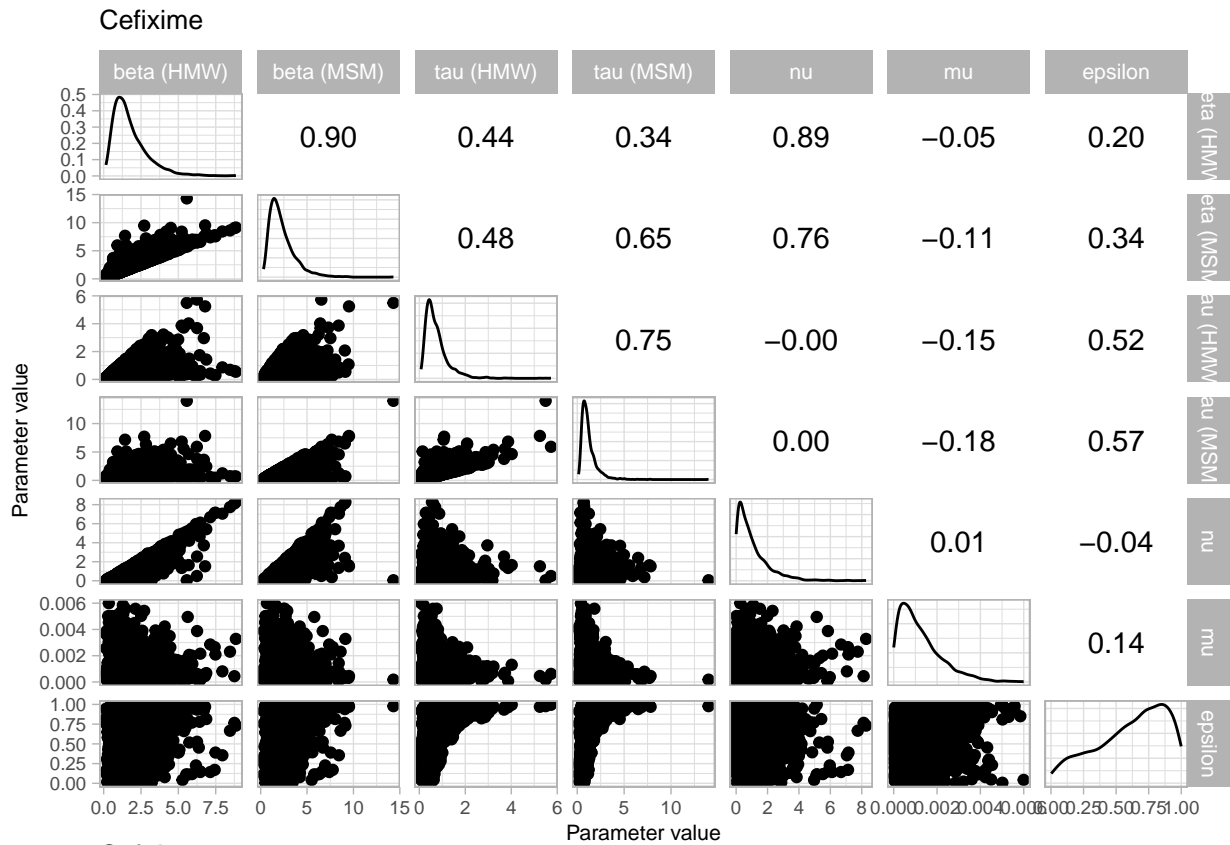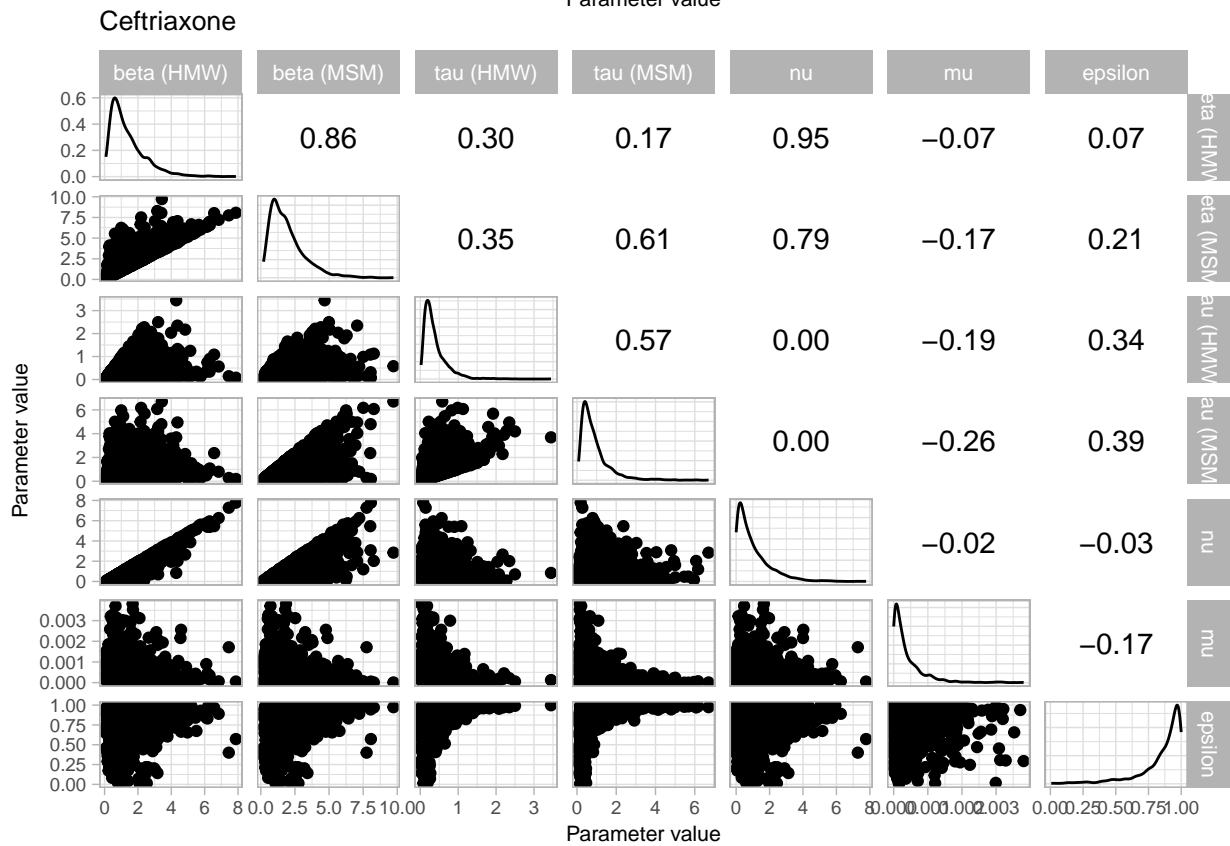

## Multi-step models

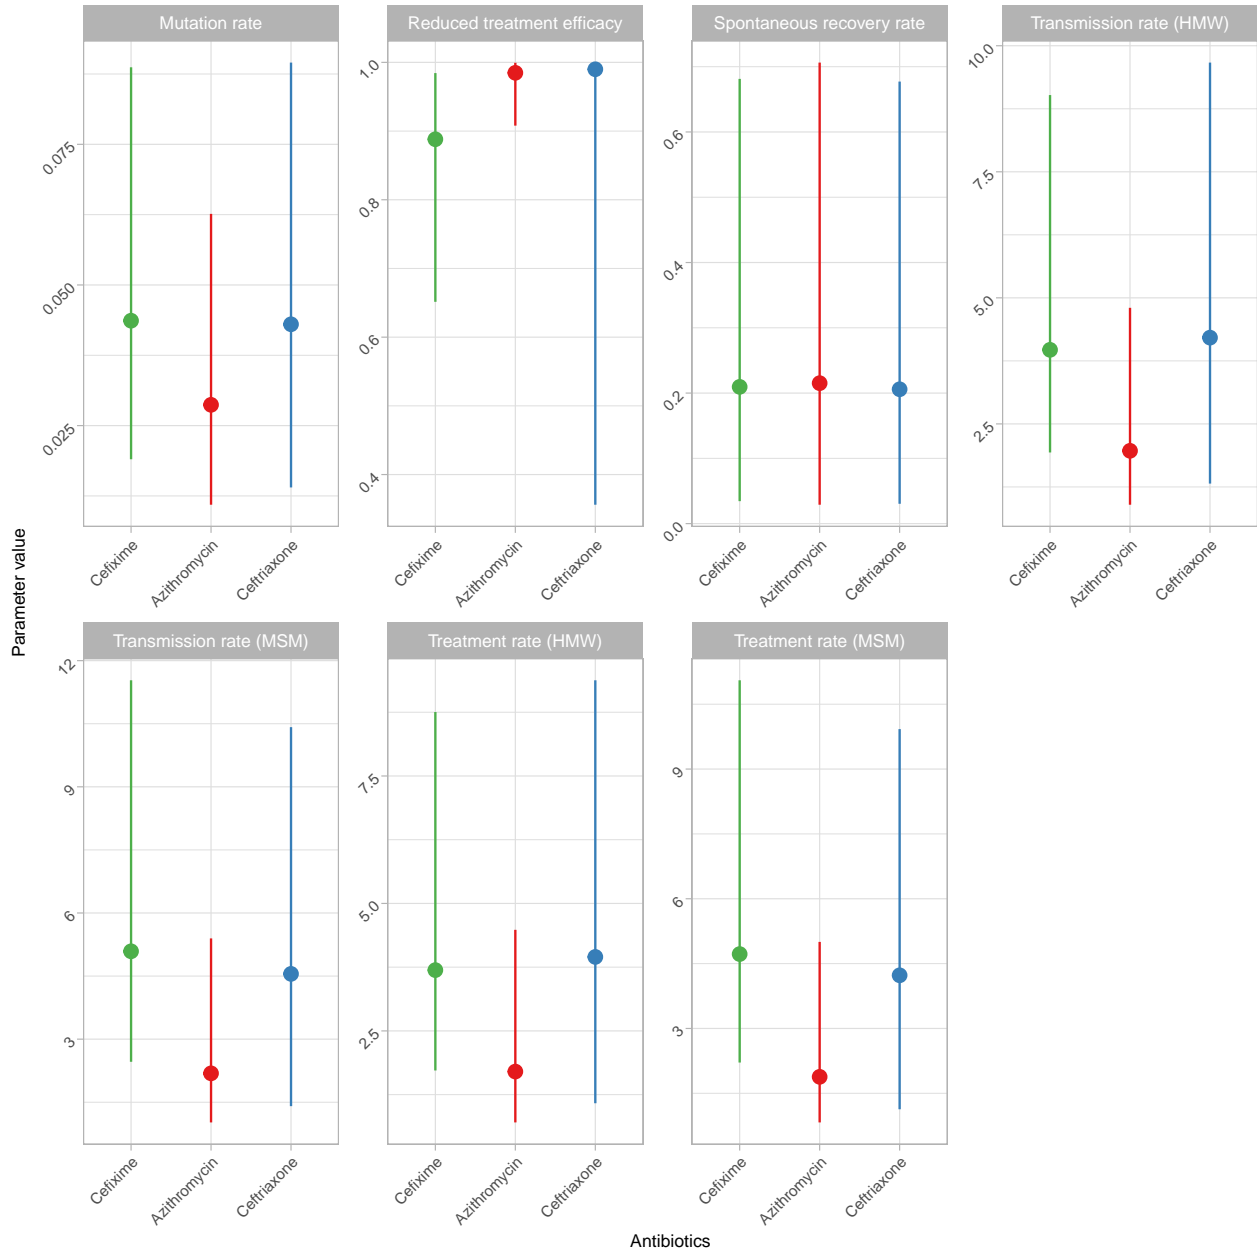

### Azithromycin

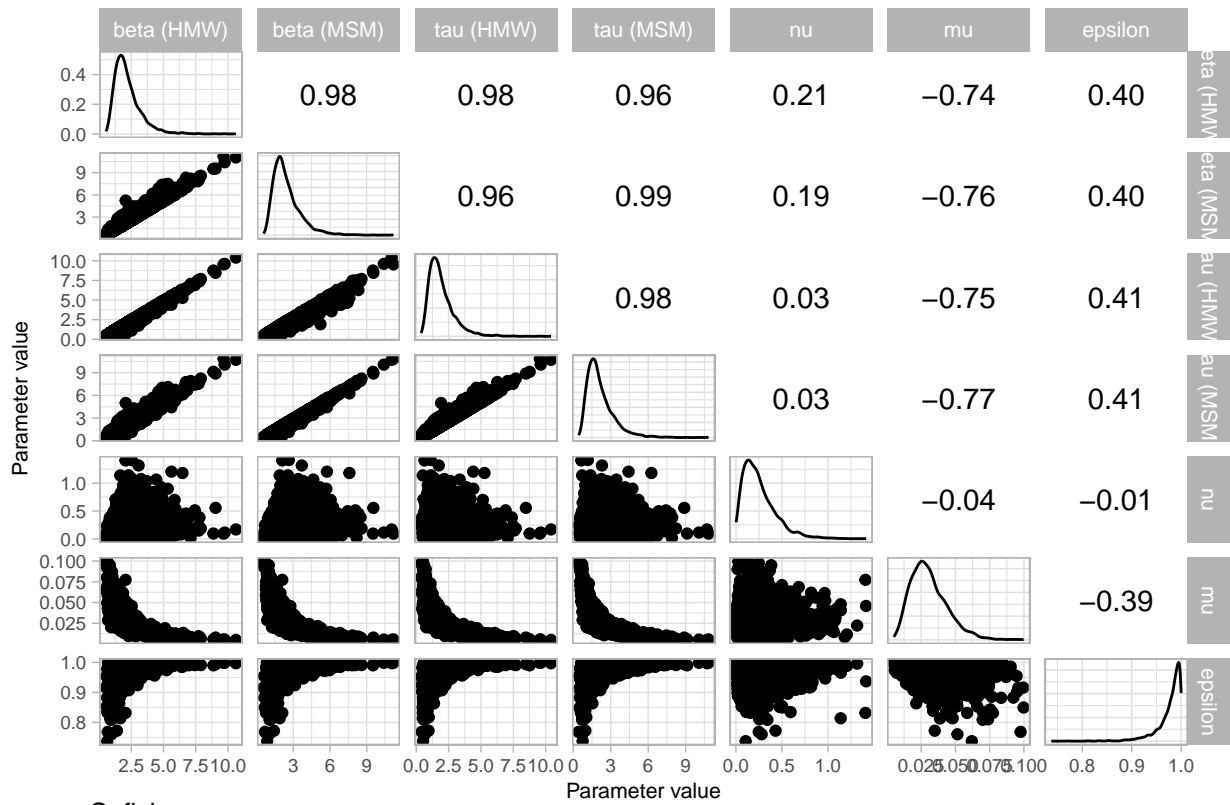

### Cefixime

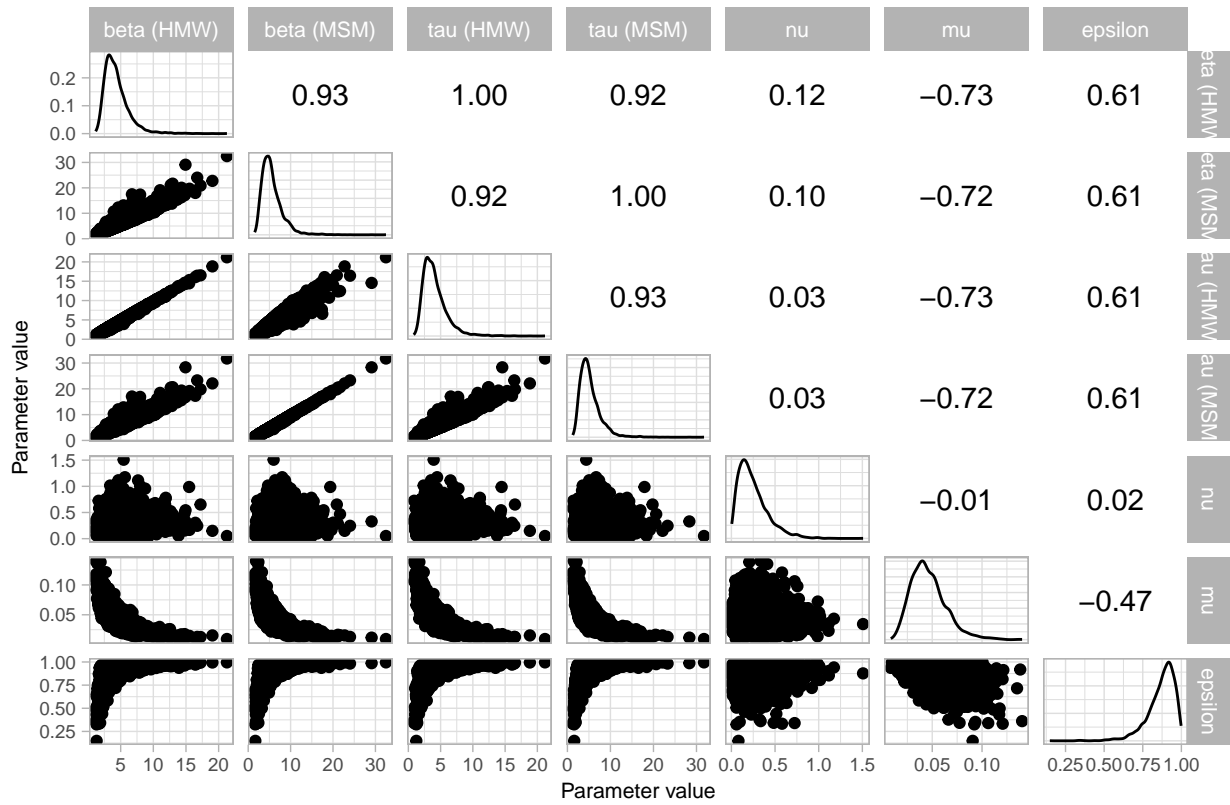

Ceftriaxone

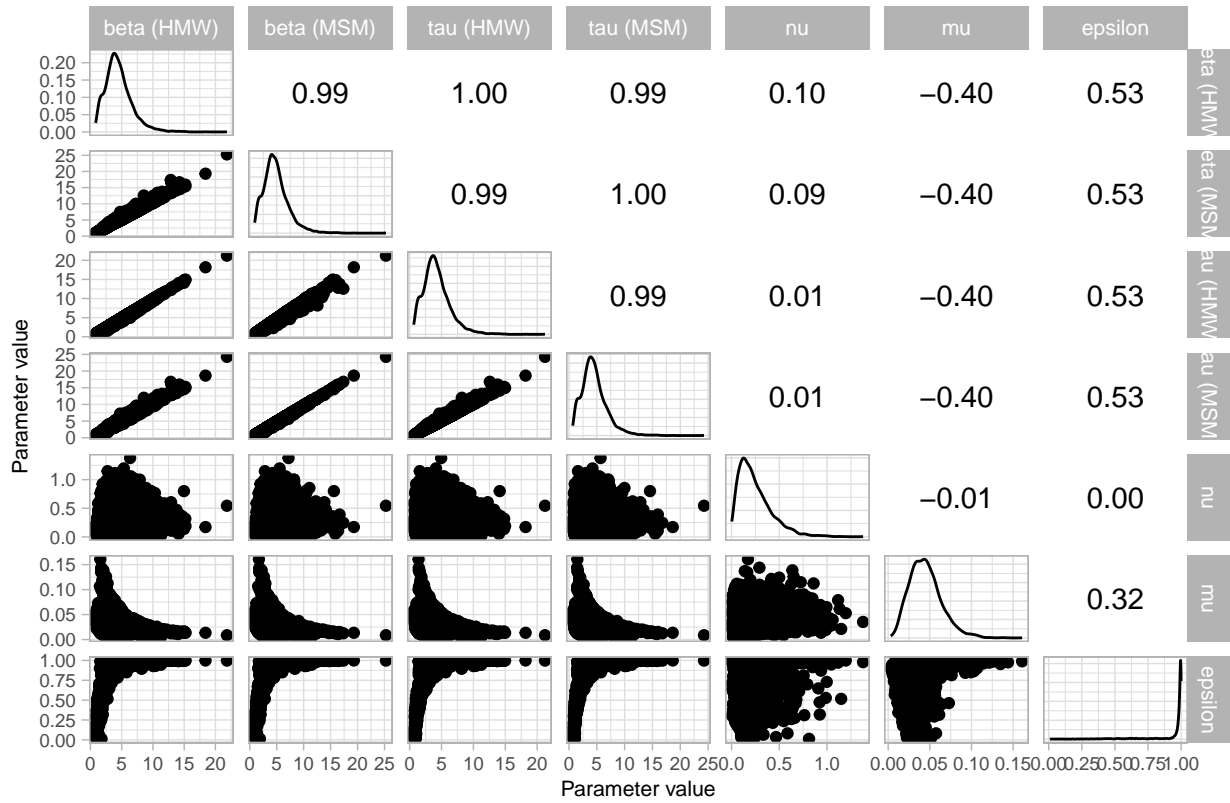

Supplement: MOESM5 [file 25264332]
